# Supplementary material for: The superior desorption properties of MgCl2-added ammonia borane compared to MgF2-added systems—the unexpected role of MgCl2 interacting with [NH3] units
Source: Royal Society of Chemistry journal article supplement (doi:10.1039/c7ra06428d), 2017-01-01
Supplement: c7ra06428d1.pdf [file c7ra06428d1.pdf]

## Electronic Supplementary Information (ESI)

# **Superior desorption properties of MgCl<sub>2</sub>-added ammonia borane compared to MgF<sub>2</sub>-added systems—Unexpected role of MgCl<sub>2</sub> interacting with [NH<sub>3</sub>] units**

Xiaoli Ding,<sup>a</sup> Jingjing Feng,<sup>a</sup> Tianlai Xia,<sup>a</sup> Xiaomin Yuan,<sup>\*a</sup> Dongming Liu,<sup>a</sup> Yongtao Li<sup>\*a</sup> and Qingan  
Zhang<sup>a</sup>

<sup>a</sup> *School of Materials Science and Engineering, Anhui University of Technology, Maanshan, 243002,  
China.*

---

\* Corresponding authors. Tel. & Fax: +86-555-2311 570, E-mail: yuan@ahut.edu.cn; toni-li@163.com

## MATERIALS AND METHODS

All the chemical reagents including  $\text{NH}_3\text{BH}_3$  (AB, 97% purity), anhydrous  $\text{MgCl}_2$  and  $\text{MgF}_2$  (98% purity) were purchased from Sigma Aldrich and used without purification. The AB powder was then mechanically milled with  $\text{MgCl}_2$  or  $\text{MgF}_2$  in a molar ratio of 2: 1 for 2 h under argon atmosphere by using a planetary mill at 400 rpm with a 40:1 ball to powder ratio. The post-milled samples were denoted as  $\text{MgCl}_2/2\text{AB}$  or  $\text{MgF}_2/2\text{AB}$ , respectively. For comparison, the pristine was also milled under the same conditions.

## CHARACTERIZATION

The thermal decomposition behaviors were studied using synchronous thermogravimetry/mass spectroscopy (TG/MS, Netzsch STA 409 PC) with a ramping rate of  $5^\circ\text{C}\cdot\text{min}^{-1}$  under a flowing Ar (99.999% purity) atmosphere. All the sample handlings were carried out in an Ar-filled glove box. To reveal the phase components and chemical bonding states, X-ray diffraction (XRD) and Raman spectroscopy were carried out on a Rigaku D/max 2500 with  $\text{Cu } K_\alpha$  radiation, a RBD upgraded PHI-5000C ESCA system with Al  $K_\alpha$  X-ray source and a Renishaw inVia Reflex Raman spectrometer excited by a 514 nm argon ion laser, respectively. Their in situ Raman measurements were carried out to examine the variations of chemical bonds under Ar atmosphere (99.999% purity) in temperatures ranging from room temperature to  $250^\circ\text{C}$  at a ramping rate of  $5^\circ\text{C}\cdot\text{min}^{-1}$ . The  $^{11}\text{B}$  solid-state nuclear magnetic resonance (NMR) spectra for the composites were recorded on a Bruker DSX-300 NMR spectrometer using a Doty CP-MAS probe with no probe background. All solid samples were placed in 4 mm  $\text{ZrO}_2$  rotors and spun at 14 kHz. A 0.25 ms single-pulse excitation at an effective rf-field strength of 111 kHz were employed with repetition times of 1.5 s. All the measurements were performed in a flowing dry  $\text{N}_2$  environment because of the  $\text{H}_2\text{O}/\text{O}_2$  reactivity of the samples.

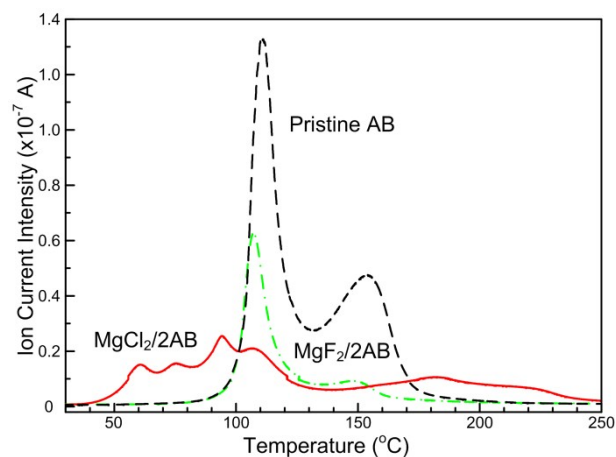

**Fig. S1.** Enlarged MS spectra of  $H_2$  released from pristine AB and ball-milled  $MgX_2$  ( $X = F, Cl$ )/AB (molar ratio, 1:2) samples.

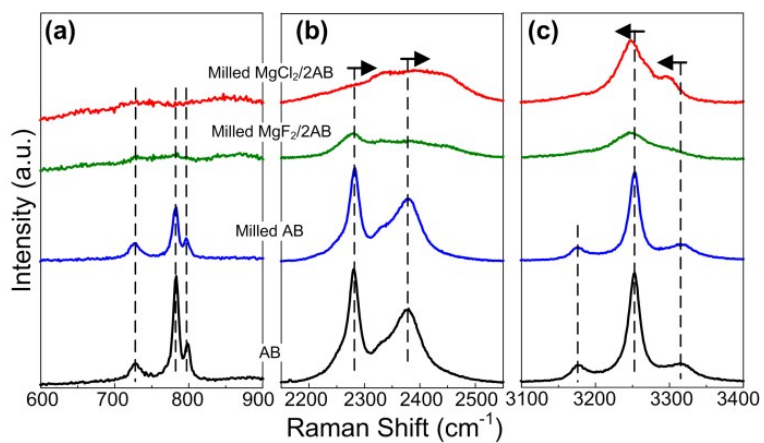

**Fig. S2.** Raman spectra for the pristine AB, post-milled AB and post-milled  $MgX_2/2AB$  ( $X = F, Cl$ ): (a) B–N stretching modes, (b) B–H stretching modes and (c) N–H stretching modes.

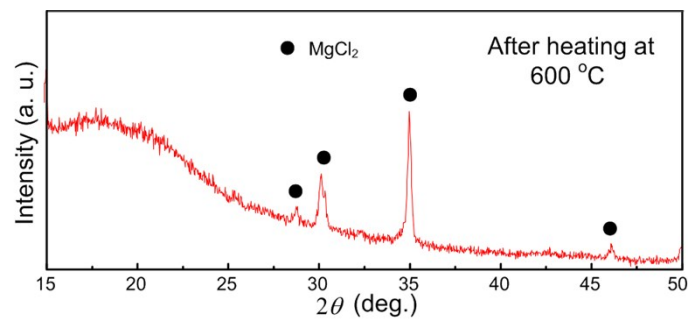

**Fig. S3.** XRD pattern for the post-milled MgCl<sub>2</sub>/2AB after heating at 600 °C.
